# Supplementary material for: Inducing octahedral distortion to enhance NIR emission in Cr-doped garnet Ca3(Al, Sc)2Ge3O12
Source: Royal Society of Chemistry journal article supplement (doi:10.1039/d3tc00528c), 2023-01-01
Supplement: d3tc00528c1.pdf [file d3tc00528c1.pdf]

## Supporting Information

### Inducing octahedral distortion to enhance NIR emission in Cr-doped garnet $\text{Ca}_3(\text{Al},\text{Sc})_2\text{Ge}_3\text{O}_{12}$

Chuxin Cai, Shengqiang Liu, Fangyi Zhao, Hao Cai, Zhen Song\*, and Quanlin, Liu\*

The Beijing Municipal Key Laboratory of New Energy Materials and Technologies, School of Materials Sciences and Engineering, University of Science and Technology Beijing, Beijing 100083, China. E-mail: zsong@ustb.edu.cn, [qlliu@ustb.edu.cn](mailto:qlliu@ustb.edu.cn)

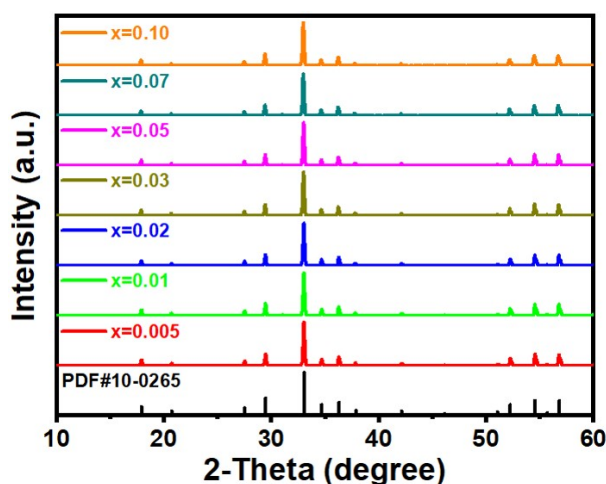

Fig. S1 XRD patterns of CAGO: 2xCr<sup>3+</sup>.

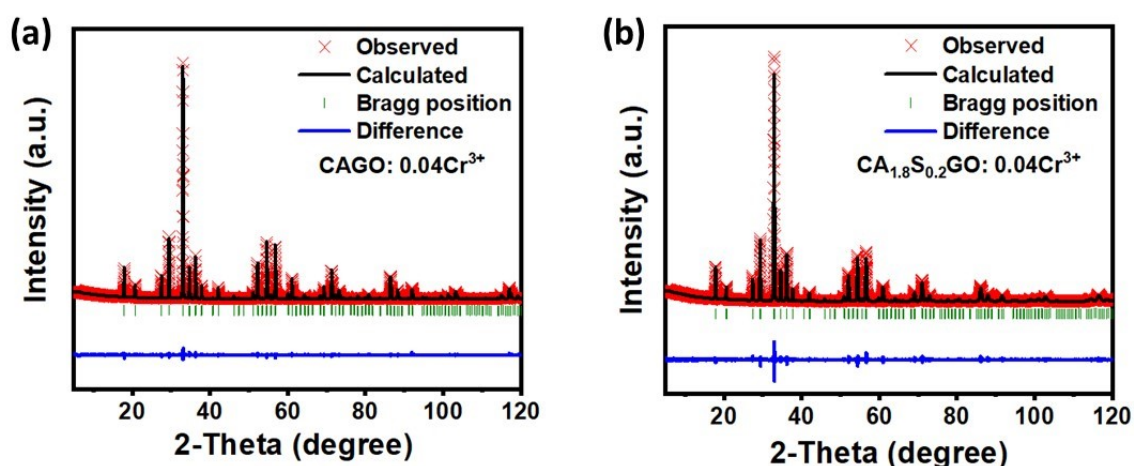

Fig. S2 The refinement results of (a) CAGO: 0.04Cr<sup>3+</sup> and (b) CA<sub>1.8</sub>S<sub>0.2</sub>GO: 0.04Cr<sup>3+</sup>.

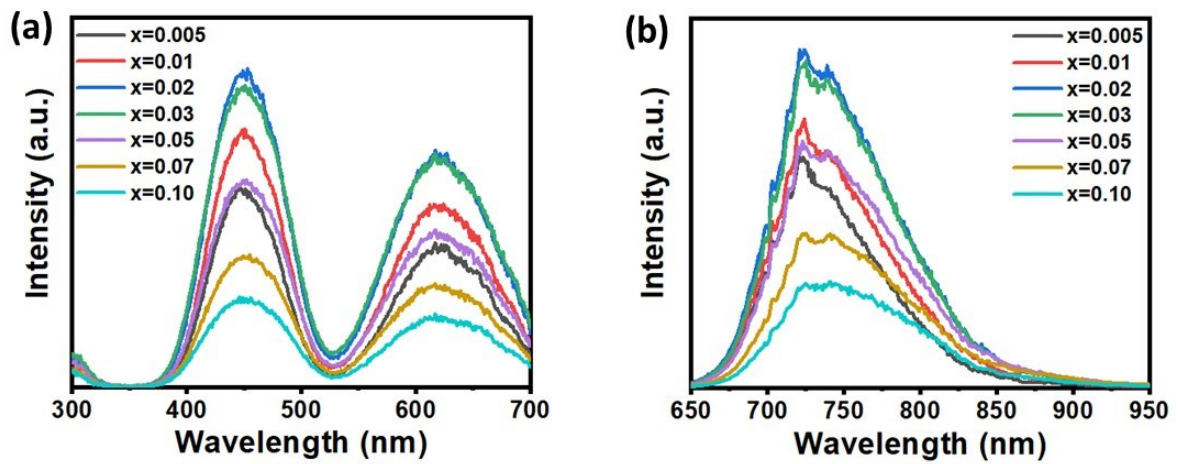

Fig. S3 (a) PLE and (b) PL spectra of CAGO:  $2x\text{Cr}^{3+}$ .

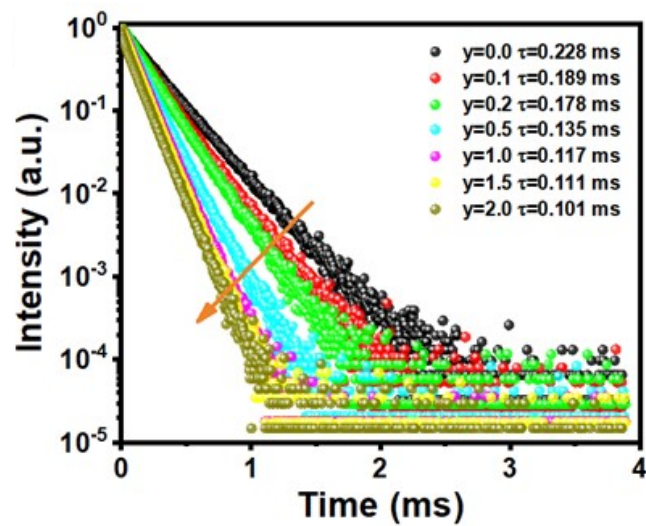

Fig. S4 Decay curves of  $\text{CA}_{2-y}\text{S}_y\text{GO}: 0.04\text{Cr}^{3+}$ .

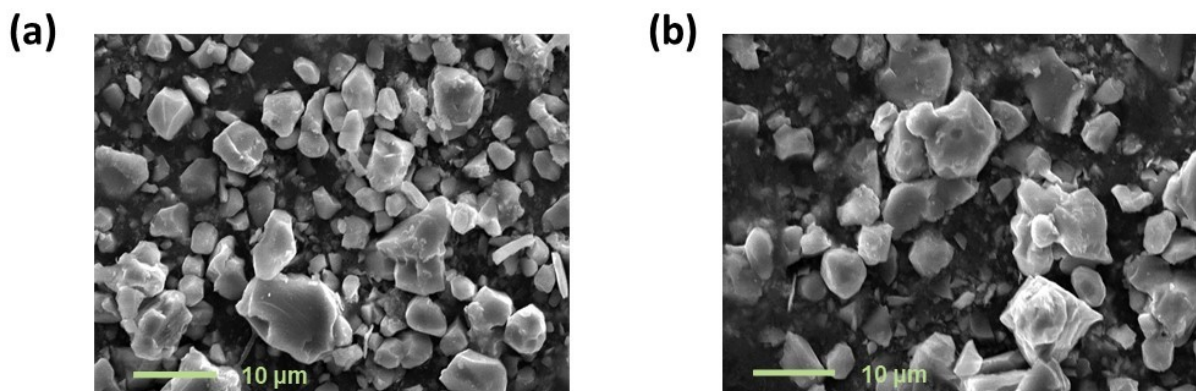

Fig. S5 SEM images of (a) CAGO:  $0.04\text{Cr}^{3+}$  and (b)  $\text{CA}_{1.8}\text{S}_{0.2}\text{GO}: 0.04\text{Cr}^{3+}$ .

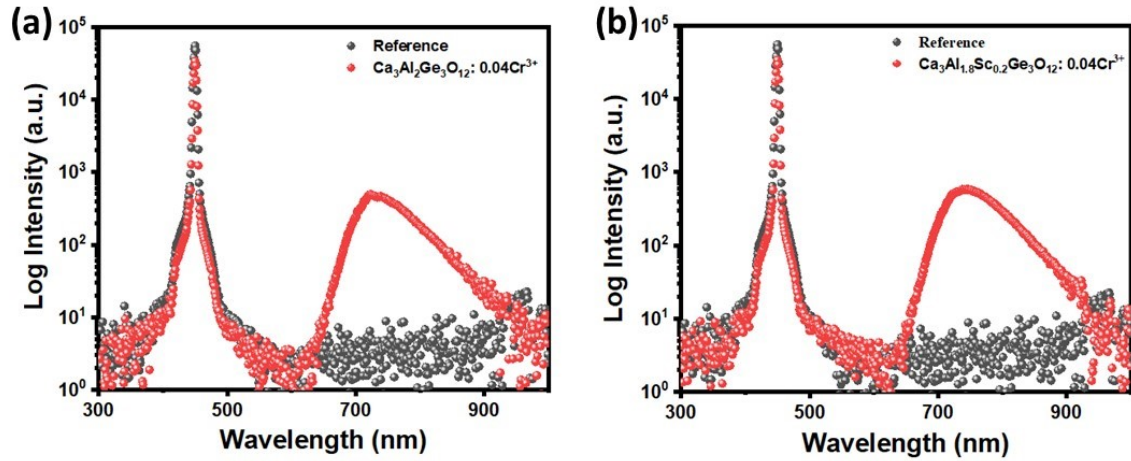

**Fig. S6** Spectra of (a) CAGO: 0.04Cr<sup>3+</sup> and (b) CA<sub>1.8</sub>S<sub>0.2</sub>GO: 0.04Cr<sup>3+</sup> to determine the QE values.

**Table S1** Rietveld refinement results of Ca<sub>3</sub>Al<sub>2</sub>Ge<sub>3</sub>O<sub>12</sub>: 0.04Cr<sup>3+</sup> and Ca<sub>3</sub>Al<sub>1.8</sub>Sc<sub>0.2</sub>Ge<sub>3</sub>O<sub>12</sub>: 0.04Cr<sup>3+</sup>

| Phosphor                 | Ca <sub>3</sub> Al <sub>2</sub> Ge <sub>3</sub> O <sub>12</sub> : 0.04Cr <sup>3+</sup> | Ca <sub>3</sub> Al <sub>1.8</sub> Sc <sub>0.2</sub> Ge <sub>3</sub> O <sub>12</sub> : 0.04Cr <sup>3+</sup> |
|--------------------------|----------------------------------------------------------------------------------------|------------------------------------------------------------------------------------------------------------|
| Space group              | I a -3 d                                                                               | I a -3 d                                                                                                   |
| Symmetry                 | cubic                                                                                  | cubic                                                                                                      |
| a = b = c (Å)            | 12.121(5)                                                                              | 12.160(1)                                                                                                  |
| α = β = γ (°)            | 90                                                                                     | 90                                                                                                         |
| Volume (Å <sup>3</sup> ) | 1781.038(9)                                                                            | 1798.103(2)                                                                                                |
| Z                        | 8                                                                                      | 8                                                                                                          |
| R <sub>p</sub> (%)       | 12.4                                                                                   | 14.0                                                                                                       |
| R <sub>wp</sub> (%)      | 14.2                                                                                   | 15.1                                                                                                       |
| χ <sup>2</sup>           | 1.86                                                                                   | 2.09                                                                                                       |

**Table S2** Values of decay time in Ca<sub>3</sub>Al<sub>2-y</sub>Sc<sub>y</sub>Ge<sub>3</sub>O<sub>12</sub>: 0.04Cr<sup>3+</sup> fitted by equation " $I_t = I_0 + A \cdot \exp(-t/\tau)$ "

| y     | 0     | 0.1   | 0.2   | 0.5   | 1.0   | 1.5   | 2.0   |
|-------|-------|-------|-------|-------|-------|-------|-------|
| τ(μs) | 228   | 189   | 178   | 135   | 117   | 111   | 101   |
| A     | 0.972 | 1.010 | 1.034 | 0.997 | 1.017 | 0.965 | 0.861 |

**Table S3** Electro-optical performance of NIR pc-LEDs reported recently.

| Phosphors                                                                            | $\lambda_{\max}$ (nm) | NIR output power | Conversion efficiency | Refs.     |
|--------------------------------------------------------------------------------------|-----------------------|------------------|-----------------------|-----------|
| $\text{Ca}_3\text{Al}_{1.8}\text{Sc}_{0.2}\text{Ge}_3\text{O}_{12}:\text{Cr}$        | 744                   | 38.2 mW @ 100 mA | 13.7%                 | This work |
| $\text{CaLu}_2\text{Mg}_2\text{Si}_3\text{O}_{12}:\text{Cr}^{3+}$                    | 750                   | 70 mW @ 100 mA   | 23.2%                 | 1         |
| $\text{Mg}_7\text{Ga}_2\text{GeO}_{12}:\text{Cr}^{3+}$                               | 750                   | 23.9 mW @ 100 mA | 8.5%                  | 2         |
| $\text{Gd}_3\text{Sc}_{1.5}\text{Al}_{0.5}\text{Ga}_3\text{O}_{12}:\text{Cr}^{3+}$   | 756                   | 100 mW @ 100 mA  | 14.0%                 | 3         |
| $\text{Ca}_3\text{Sc}_2\text{Si}_3\text{O}_{12}:\text{Cr}^{3+}$                      | 770                   | 23.7 mW @ 100 mA | 8.9%                  | 4         |
| $\text{Ca}_2\text{YHf}_2\text{Al}_3\text{O}_{12}:\text{Cr}^{3+}, \text{Yb}^{3+}$     | 775                   | 18 mW @ 100 mA   | 6%                    | 5         |
| $\text{CaMgSi}_2\text{O}_6:\text{Cr}^{3+}$                                           | 788                   | 42.0 mW @ 100 mA | 14.0%                 | 6         |
| $\text{KAIP}_2\text{O}_7:\text{Cr}^{3+}$                                             | 790                   | 31.1 mW @ 100 mA | 11.4%                 | 7         |
| $\text{Ca}_2\text{LuGa}_3\text{Ge}_2\text{O}_{12}:\text{Cr}^{3+}$                    | 803                   | 27.1 mW @ 100 mA | 16.3%                 | 8         |
| $\text{Ca}_2\text{LaZr}_2\text{Ga}_{2.8}\text{Al}_{0.2}\text{O}_{12}:\text{Cr}^{3+}$ | 820                   | 25 mW @ 100 mA   | 11.5%                 | 9         |
| $\text{Sr}_9\text{Ga}(\text{PO}_4)_7:\text{Cr}^{3+}$                                 | 850                   | 19.8 mW @ 150 mA | 4.3%                  | 10        |
| $\text{LiInSi}_2\text{O}_6:\text{Cr}^{3+}$                                           | 860                   | 51.6 mW @ 100 mA | 17.2%                 | 11        |
| $\text{LiScP}_2\text{O}_7:\text{Cr}^{3+}$                                            | 880                   | 19 mW @ 100 mA   | 7%                    | 12        |
| $\text{NaInGe}_2\text{O}_6:\text{Cr}^{3+}$                                           | 900                   | 25.2 mW @ 120 mA | 4.8%                  | 13        |

## Notes and References

- 1 H. Xiao, J. Zhang, L. Zhang, H. Wu, H. Wu, G. Pan, F. Liu and J. Zhang, *Adv. Opt. Mater.*, 2021, **9**, 2101134.
- 2 Y. Su, L. Yuan, H. Liu, G. Xiong, H. Wu, Y. Hu, X. Cheng and Y. Jin, *Ceram. Int.*, 2021, **47**, 23558–23563.
- 3 E. T. Basore, W. Xiao, X. Liu, J. Wu and J. Qiu, *Adv. Opt. Mater.*, 2020, **8**, 2000296.
- 4 Z. Jia, C. Yuan, Y. Liu, X.-J. Wang, P. Sun, L. Wang, H. Jiang and J. Jiang, *Light Sci. Appl.*, 2020, **9**, 86.
- 5 Q. Zhang, G. Li, P. Dang, D. Liu, D. Huang, H. Lian and J. Lin, *J. Mater. Chem. C*, 2021, **9**, 4815–4824.

- 6 L. Fang, Z. Hao, L. Zhang, H. Wu, H. Wu, G. Pan and J. Zhang, *Mater. Res. Bull.*, 2022, **149**, 111725.
- 7 H. Zhang, J. Zhong, F. Du, L. Chen, X. Zhang, Z. Mu and W. Zhao, *ACS Appl. Mater. Interfaces*, 2022, **14**, 11663–11671.
- 8 T. Lang, M. Cai, S. Fang, T. Han, S. He, Q. Wang, G. Ge, J. Wang, C. Guo, L. Peng, S. Cao, B. Liu, V. I. Korepanov, A. N. Yakovlev and J. Qiu, *Adv. Opt. Mater.*, 2022, **10**, 2101633.
- 9 Y. Liu, S. He, D. Wu, X. Dong and W. Zhou, *ACS Appl. Electron. Mater.*, 2022, **4**, 643–650.
- 10 F. Zhao, H. Cai, Z. Song and Q. Liu, *Chem. Mater.*, 2021, **33**, 3621–3630.
- 11 X. Xu, Q. Shao, L. Yao, Y. Dong and J. Jiang, *Chem. Eng. J.*, 2020, **383**, 123108.
- 12 L. Yao, Q. Shao, S. Han, C. Liang, J. He and J. Jiang, *Chem. Mater.*, 2020, **32**, 2430–2439.
- 13 W. Zhou, J. Luo, J. Fan, H. Pan, S. Zeng, L. Zhou, Q. Pang and X. Zhang, *Ceram. Int.*, 2021, **47**, 25343–25349.
